# Supplementary material for: Endowing TADF luminophors with AIE properties through adjusting flexible dendrons for highly efficient solution-processed nondoped OLEDs
Source: PubMed Central journal article supplement (PMC7499814; doi:10.1039/d0sc02194f), 2020-06-16

## Supporting Information

### **Endowing TADF Luminophors with AIE Properties Though Adjusting Flexible Dendrons for Highly Efficient Solution-Processed Non-doped OLEDs.**

Dan Liu, <sup>† a</sup> Jing Yi Wei, <sup>† a</sup> Wen Wen Tian, <sup>a</sup> Wei Jiang\* <sup>a</sup>, Yue Ming Sun, <sup>a</sup> Zheng Zhao<sup>b</sup> and Ben Zhong Tang\*<sup>b</sup>

<sup>a</sup>Jiangsu Province Hi-Tech Key Laboratory for Bio-Medical Research, Jiangsu Engineering Laboratory of Smart Carbon-Rich Materials and Device, School of Chemistry and Chemical Engineering, Southeast University, Nanjing, Jiangsu, 211189, P. R. China.

<sup>b</sup>Department of Chemistry, Hong Kong Branch of Chinese National Engineering Research, Center for Tissue Restoration and Reconstruction, The Hong Kong University of Science and Technology, Clear Water Bay, Kowloon, Hong Kong 999077, China.

<sup>†</sup> Dan Liu and Jing Yi Wei are contributed equally to this work.

\*Corresponding author: Wei Jiang, [jiangw@seu.edu.cn](mailto:jiangw@seu.edu.cn)

Ben Zhong Tang, [tangbenz@ust.hk](mailto:tangbenz@ust.hk)

**KEYWORDS:** Thermally activated delayed fluorescence (TADF), Aggregation-induced emission (AIE), Core-dendron system, solution-processed, Organic light-emitting diodes (OLED).

## Figure Captions

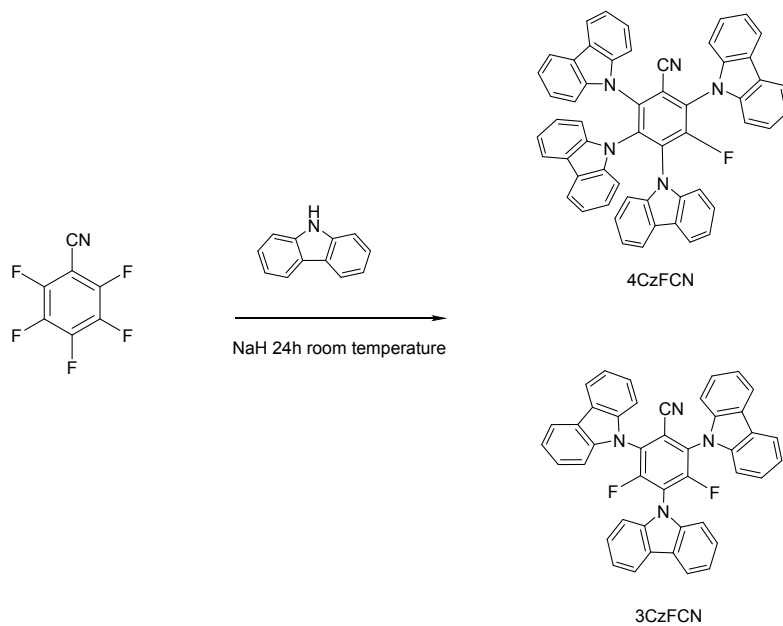

Scheme S1 Synthetic routes of 4CzFCN and 5CzFCN

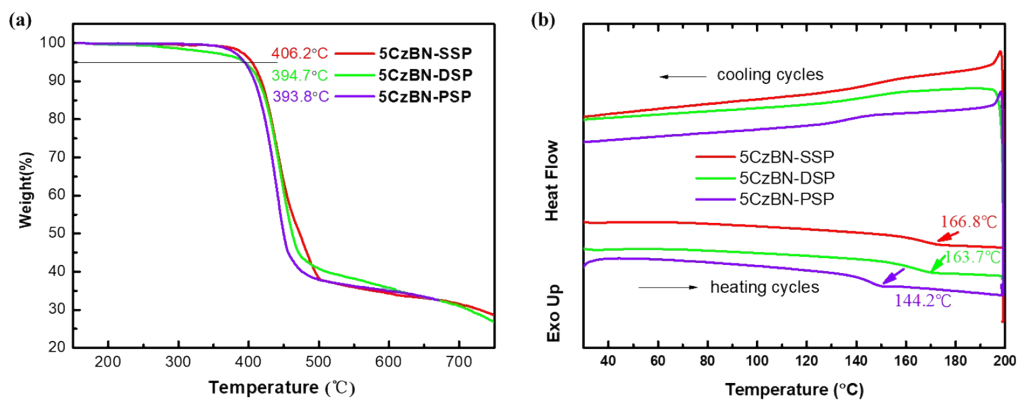

Figure S1 TGA and DSC traces of 5CzBN-SSP, 5CzBN-DSP and 5CzBN-PSP recorded at a heating rate of 10°C/min.

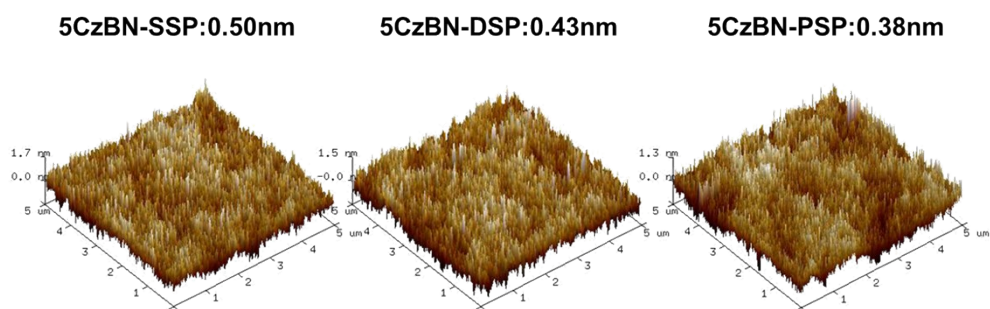

Figure S2 AFM topographic images of 5CzBN-SSP, 5CzBN-DSP and 5CzBN-PSP.

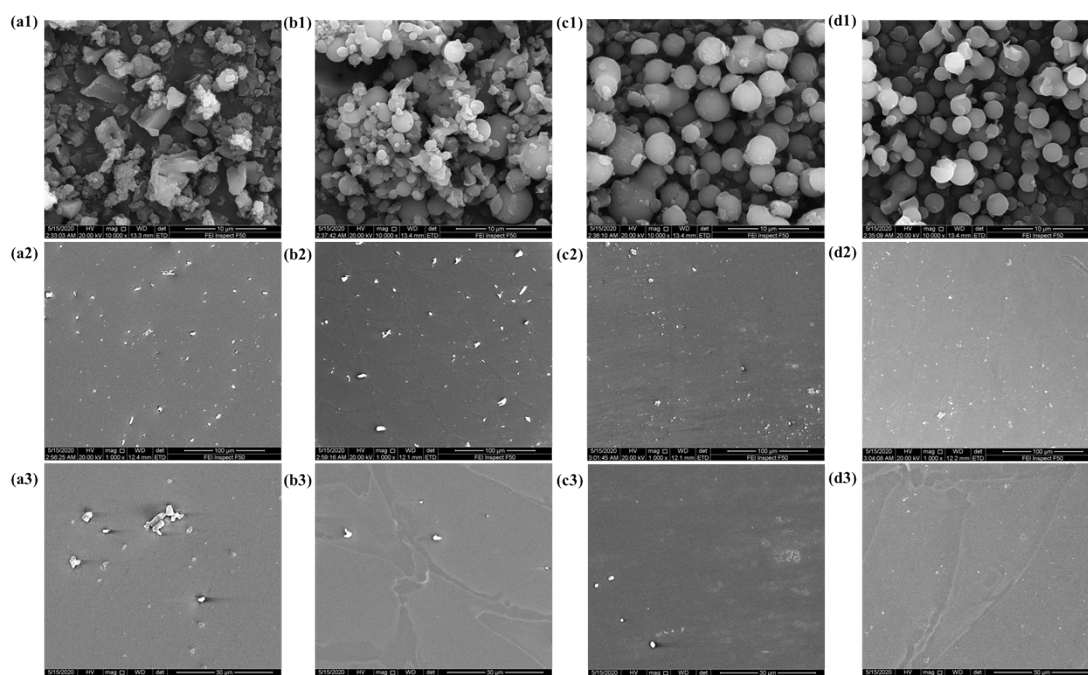

Figure S3 The SEM images of (a)5CzBN, (b)5CzBN-SSP, (c) 5CzBN-DSP and (d) 5CzBN-PSP, where a1-d1 were in the solid states, a2-d2 and a3-d3 were in solution-processed film states at various magnifications of 1000 and 4000, respectively.

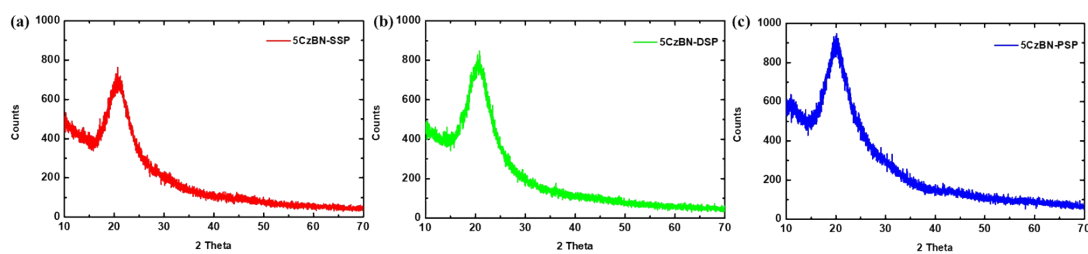

Figure S4 The XRD plots of 5CzBN-SSP, 5CzBN-DSP and 5CzBN-PSP.

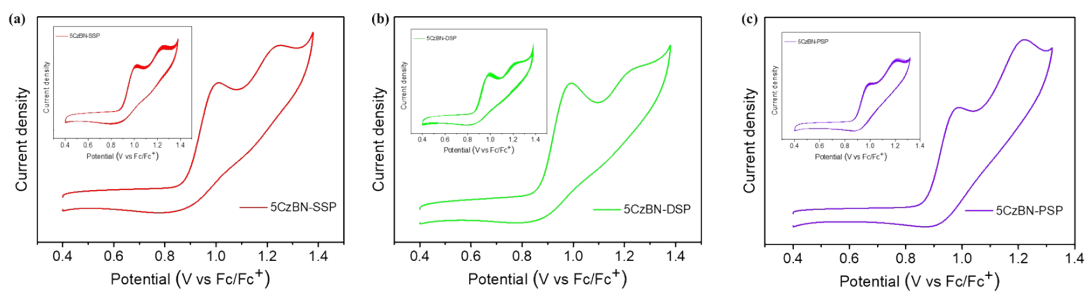

Figure S5 Cyclic voltammogram of 5CzBN-SSP (a), 5CzBN-DSP (b) and 5CzBN-PSP(c) after one circle and 100 circles (inset).

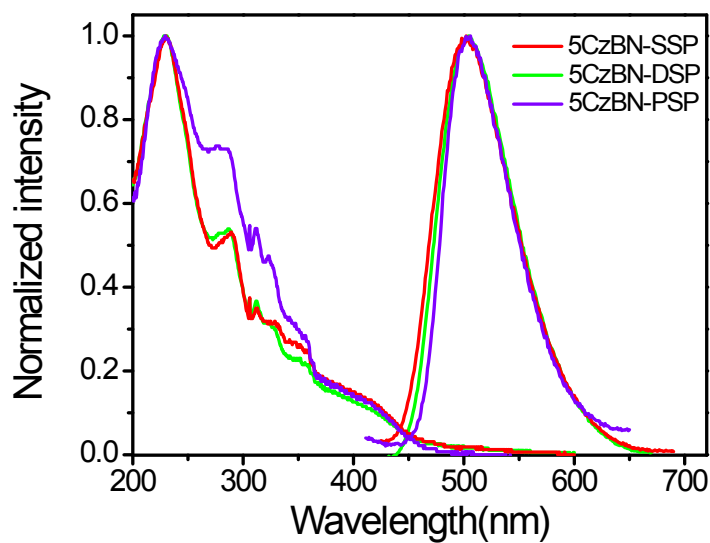

Figure S6 UV-vis absorption and fluorescence spectra of 5CzBN-SSP, 5CzBN-DSP and 5CzBN-PSP in spin-coated films.

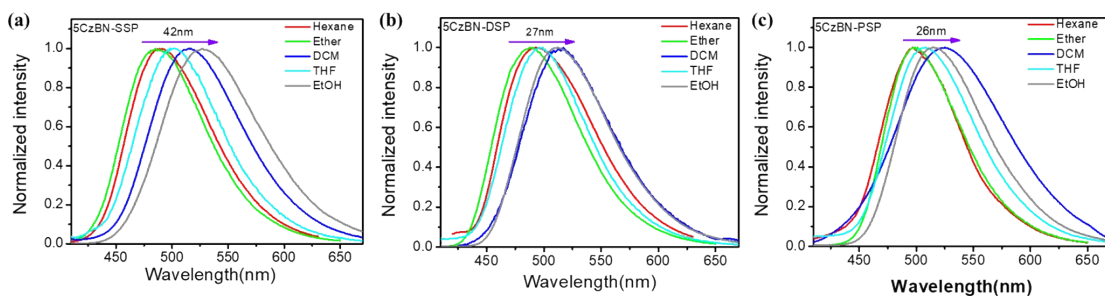

Figure S7 The PL spectra of (a) 5CzBN-SSP, (b) 5CzBN-DSP, (c) 5CzBN-PSP in hexane, ether,  $\text{CH}_2\text{Cl}_2$ , THF and EtOH.

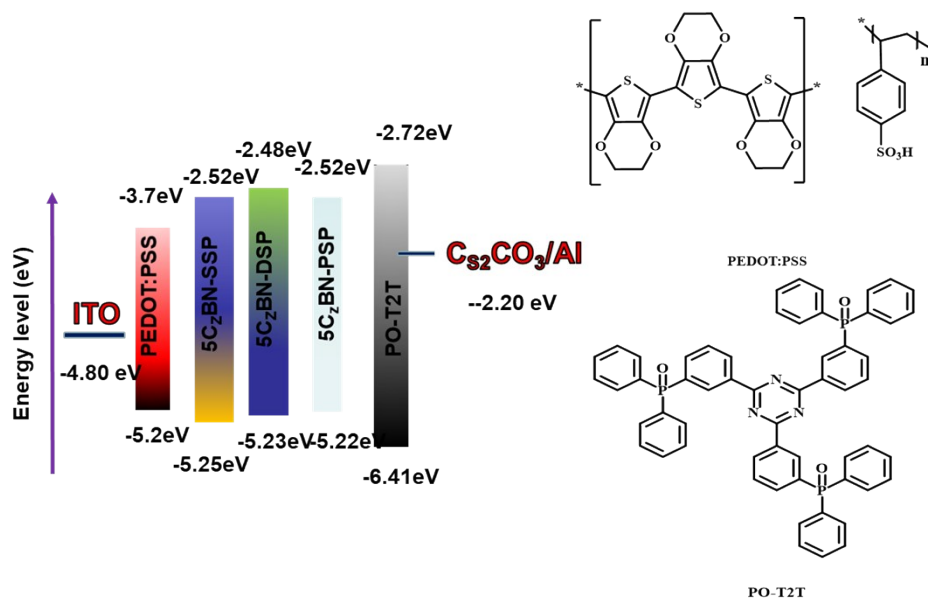

Figure S8 schematic energy-level diagrams and the fabrication process of the devices

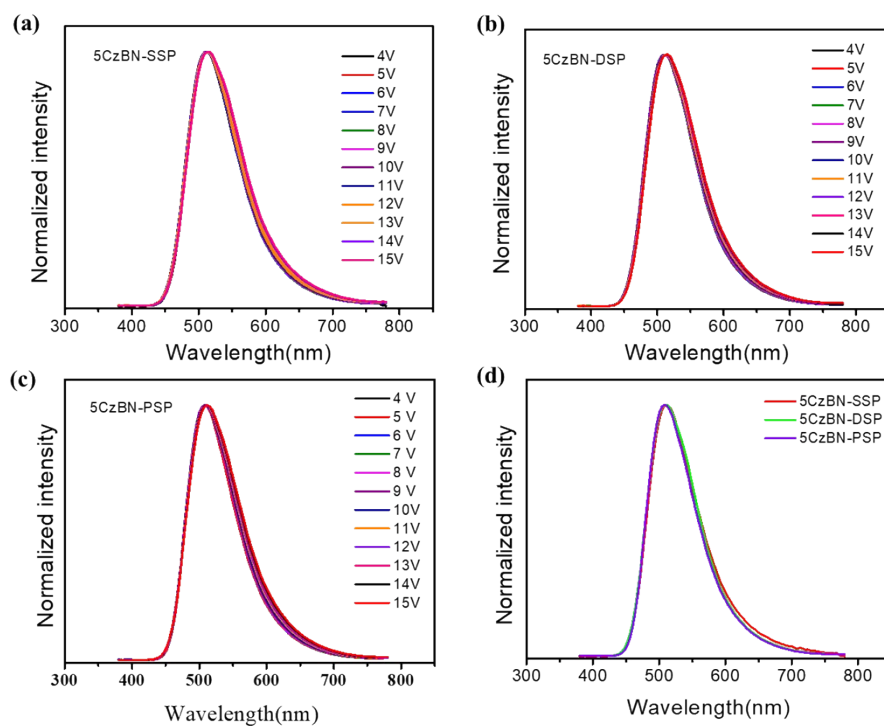

Figure S9 (a) EL spectra of 5CzBN-SSP in various voltages, (b) EL spectra of 5CzBN-DSP in various voltages, (c) EL spectra of 5CzBN-PSP in various voltages, (d) EL spectra of three materials at 10 V.

Table S1 Comparison of EL performance of solution-processed nondoped OLEDs based on AIE materials.

|                        | Solution-processed EML | EL (nm) | CE <sub>max</sub> [cd A <sup>-1</sup> l <sup>-1</sup> ] | PE <sub>max</sub> [lm W <sup>-1</sup> ] | EQE <sub>max</sub> [%] | CIE(x,y)    | Reference |
|------------------------|------------------------|---------|---------------------------------------------------------|-----------------------------------------|------------------------|-------------|-----------|
| Fully solution process | 5CzBN-PSP              | 508     | 58.7                                                    | 46.2                                    | 20.1                   | (0.28,0.54) | This work |
|                        | G2B                    | 500     | 14.0                                                    | 11.5                                    | 5.7                    | (0.26,0.48) | [47]      |
|                        | G3B                    | 516     | 7.7                                                     | 5.7                                     | 2.9                    | (0.31,0.50) | [47]      |
| ETL evaporation        | TPEF                   | 478     | 4.55                                                    | -                                       | 2.17                   | (0.21,0.32) | [48]      |
|                        | TPE-2PN2PB             | 543     | 8.3                                                     | 7.5                                     | 2.6                    | (0.37,0.54) | [49]      |
|                        | TPE-DFCz               | 500     | 1.16                                                    | -                                       | 0.46                   | (0.24,0.43) | [50]      |
|                        | p-DTPACO               | 517     | 10.8                                                    | 8.2                                     | 3.7                    | (0.33,0.51) | [51]      |
|                        | Cz-AQ                  | 600/680 | -                                                       | -                                       | 0.75/1.15              | -           | [52]      |
|                        | G2B                    | 500     | 11.3                                                    | 7.1                                     | 4.8                    | (0.25,0.44) | [47]      |
|                        | SFC                    | 536     | 3.67                                                    | -                                       | 1.37                   | (0.36,0.52) | [53]      |
|                        | CzTAZP                 | 515     | 23.1                                                    | -                                       | 9.4                    | (0.27,0.58) | [54]      |
|                        | m-ACSO2                | 486     | 37.9                                                    | 23.8                                    | 17.2                   | (0.21,0.34) | [55]      |
|                        | BPCP-2CPC              | 524     | 40.8                                                    | 28.5                                    | 13.4                   | (0.33,0.54) | [32]      |
|                        | Ac3TRZ3                | 520     | 11.4                                                    | -                                       | 3.5                    | (0.30,0.54) | [56]      |
|                        | CzTAZPO                | 537     | 29.1                                                    | -                                       | 12.8                   | (0.37,0.56) | [57]      |
|                        | 3CzTPE                 | 479     | 4.35                                                    | -                                       | 2.81                   | (0.18,0.29) | [58]      |

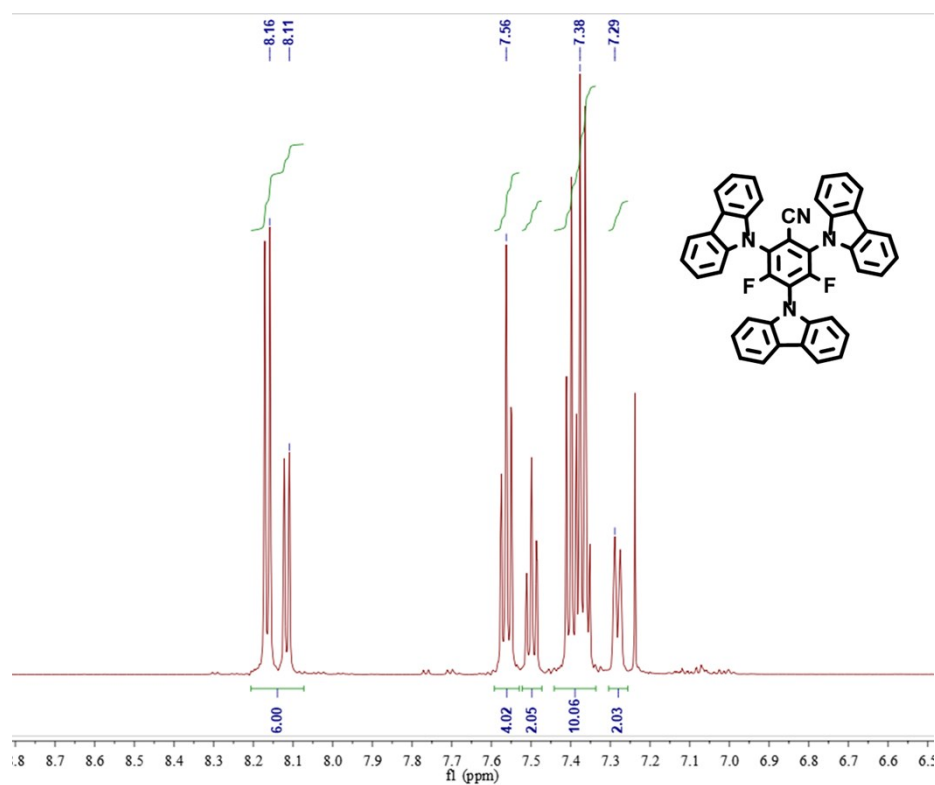

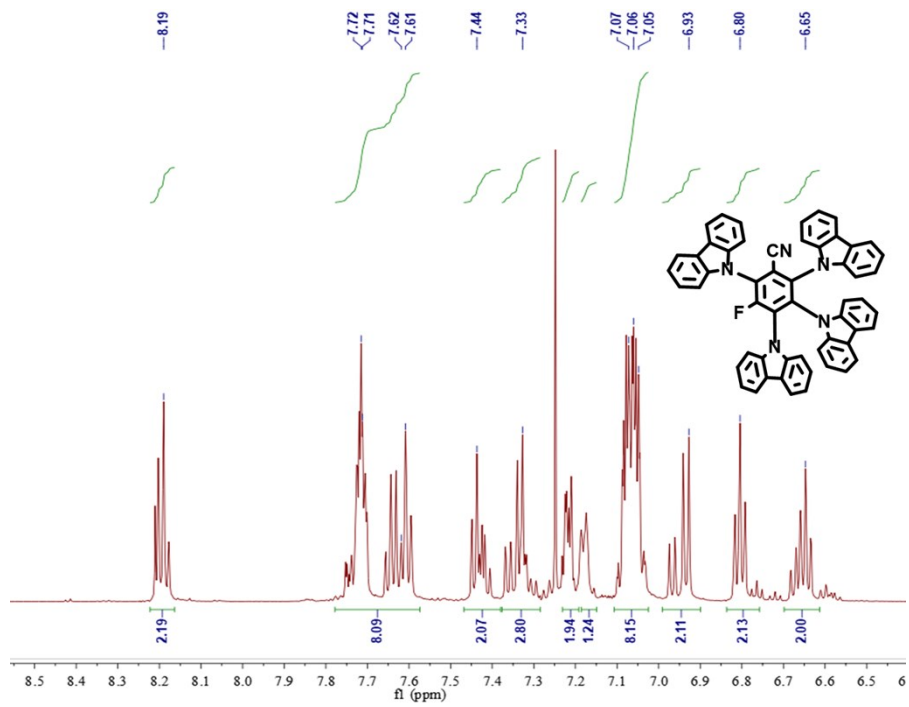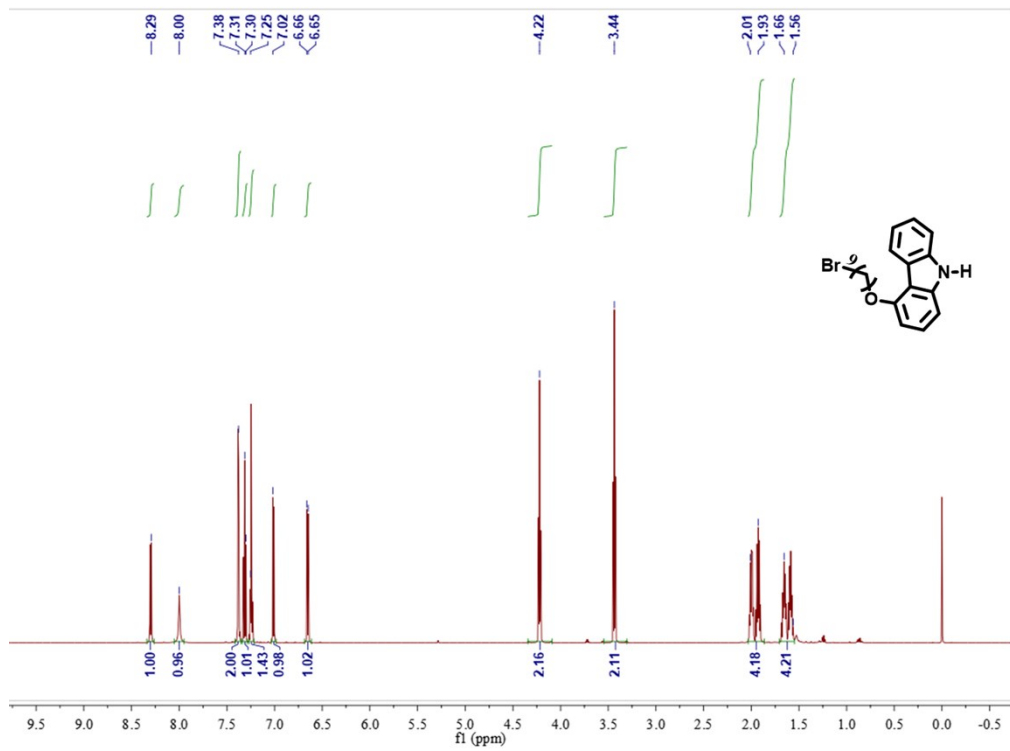

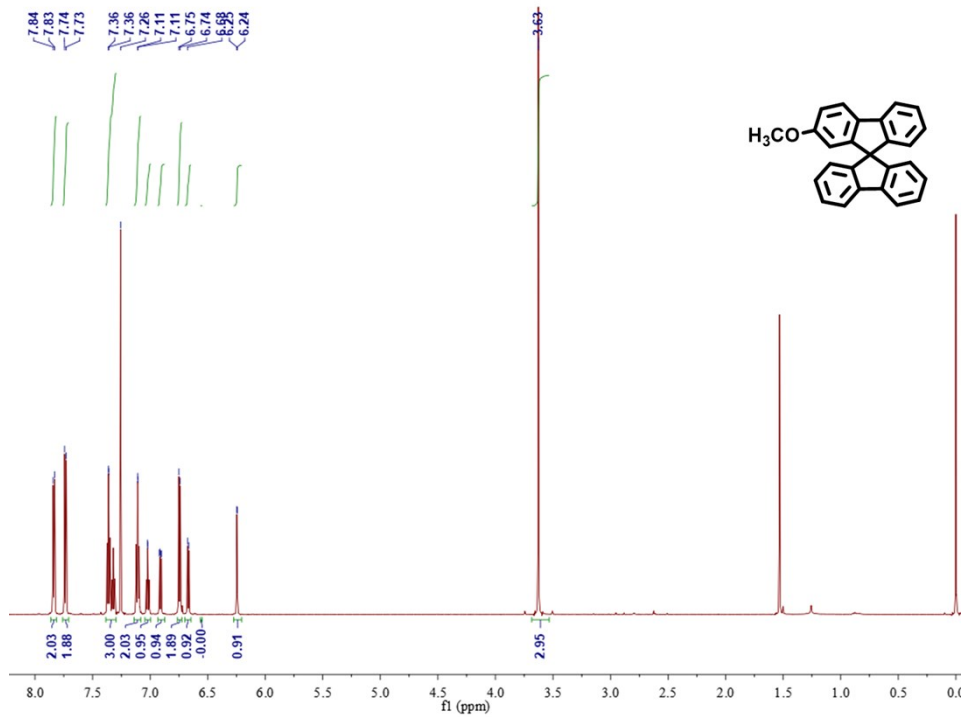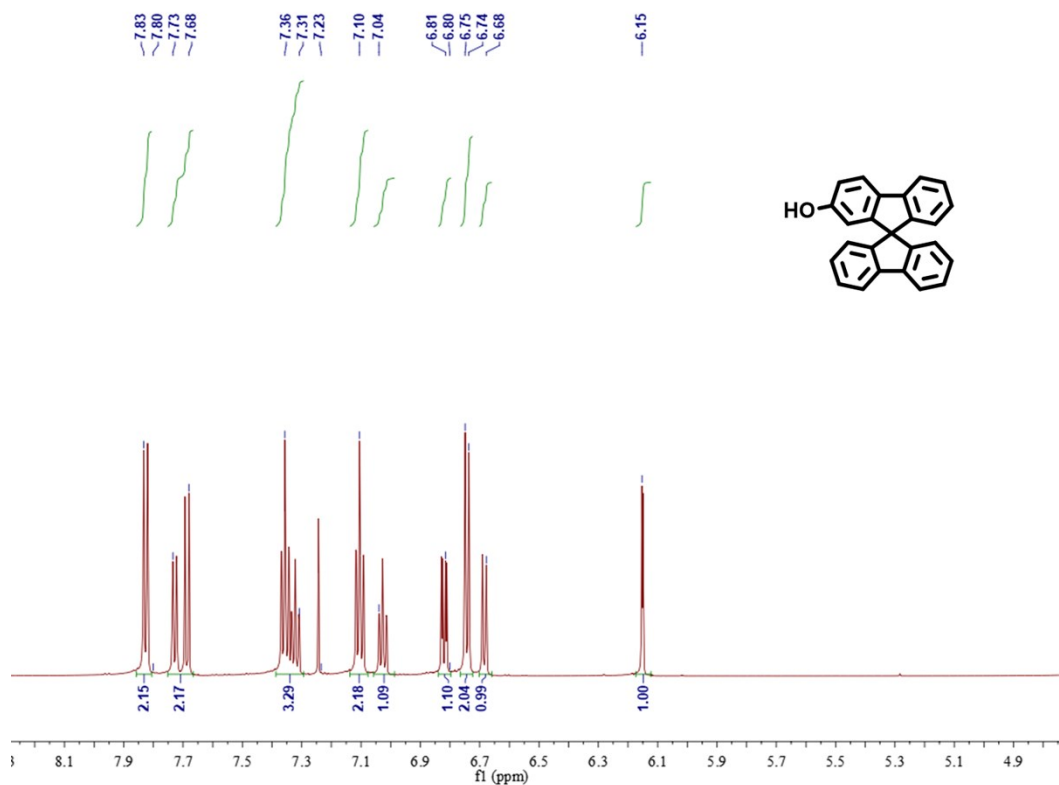



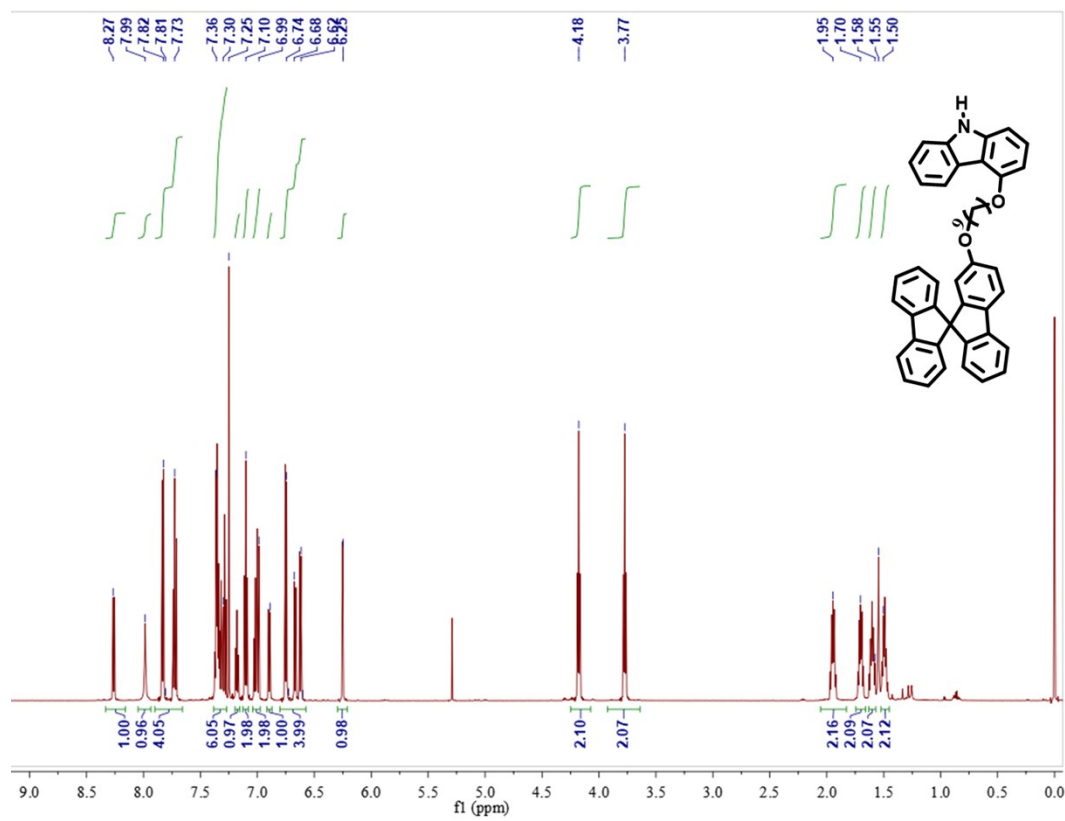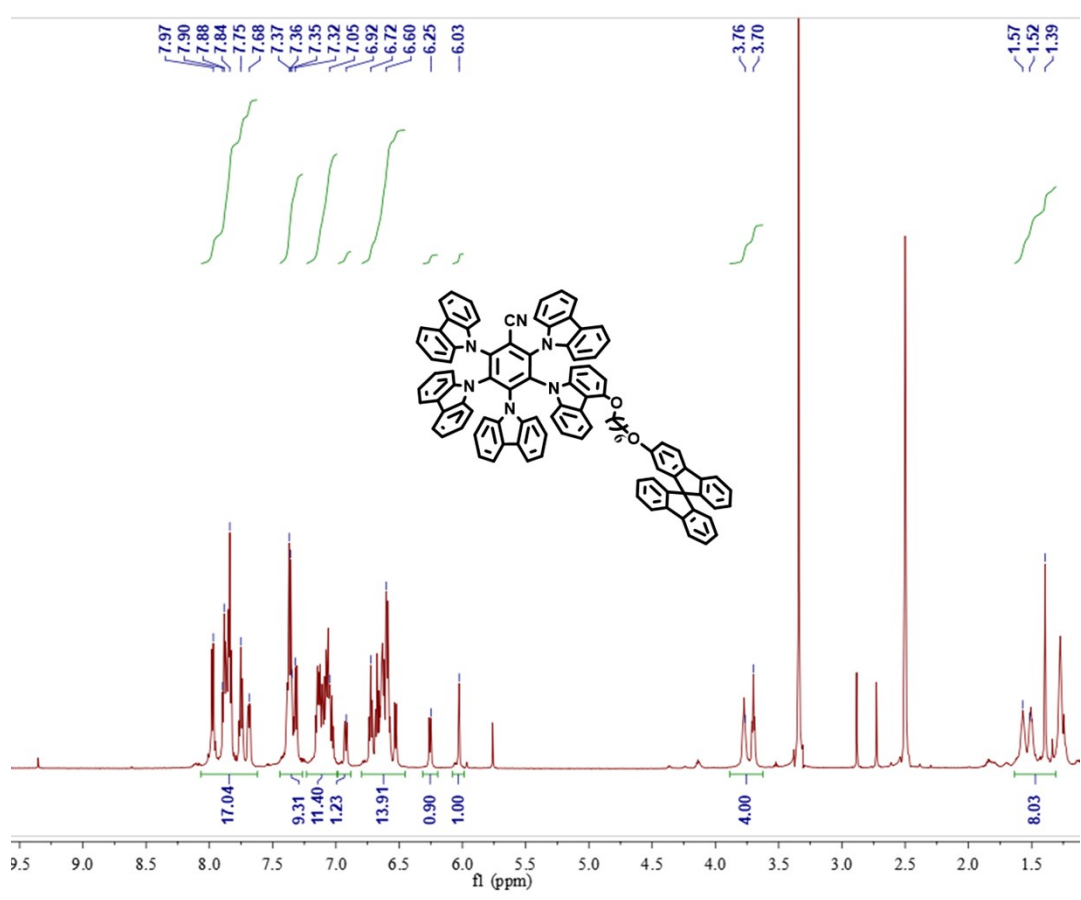

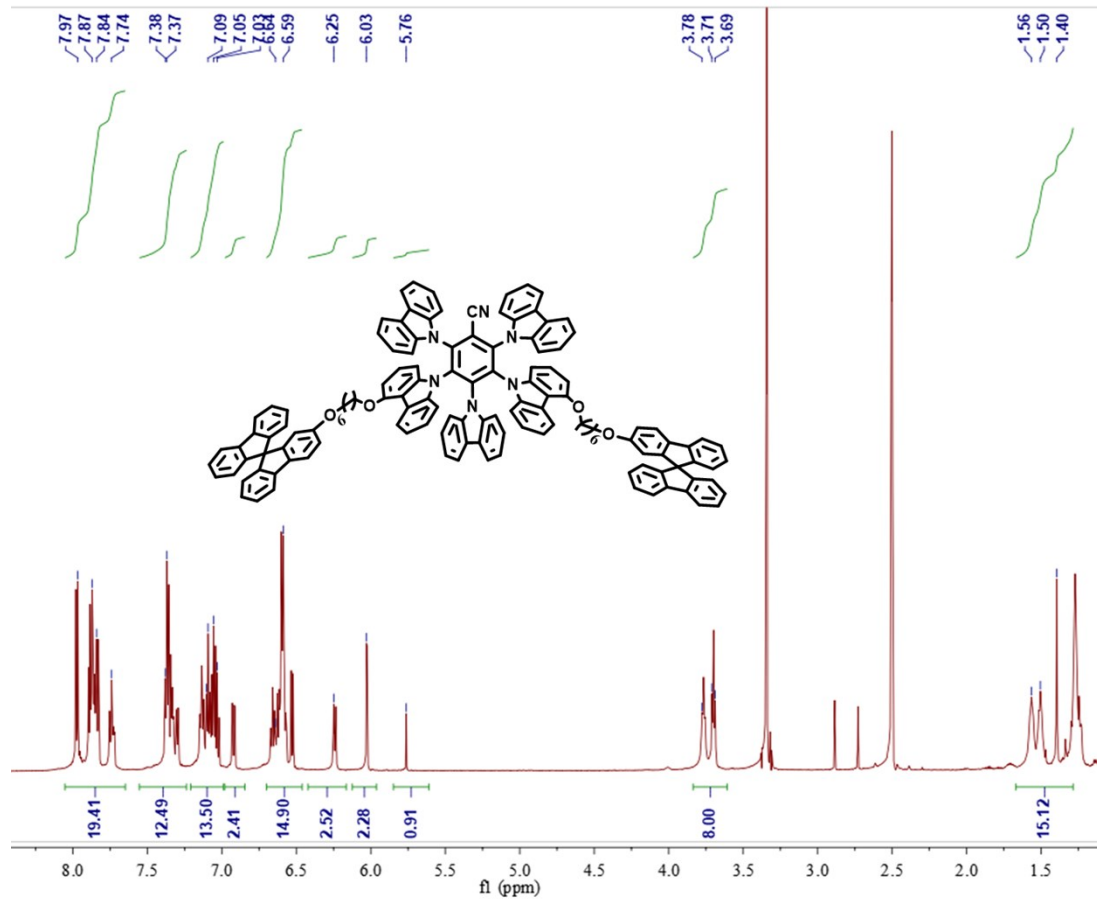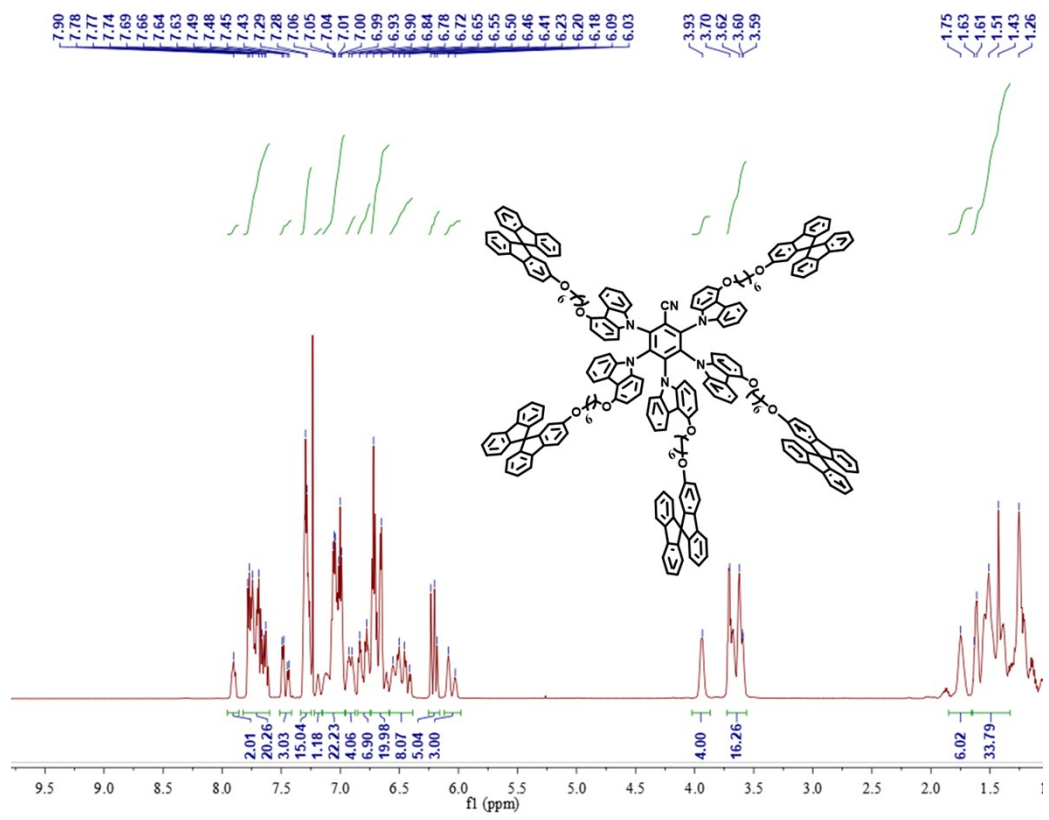



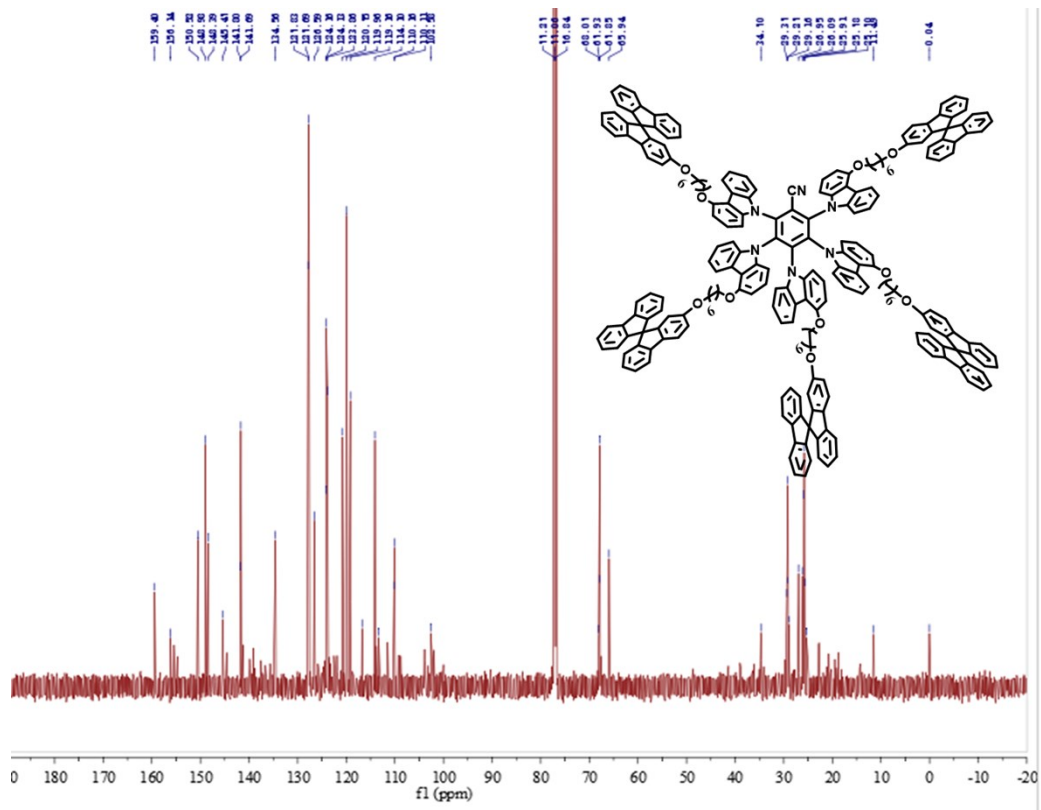

Supplement: SC-011-D0SC02194F-s001.pdf [file SC-011-D0SC02194F-s001.pdf]
